# Supplementary material
Source: PubMed Central journal article supplement (PMC6612461)

On-line Supplement Figure E1

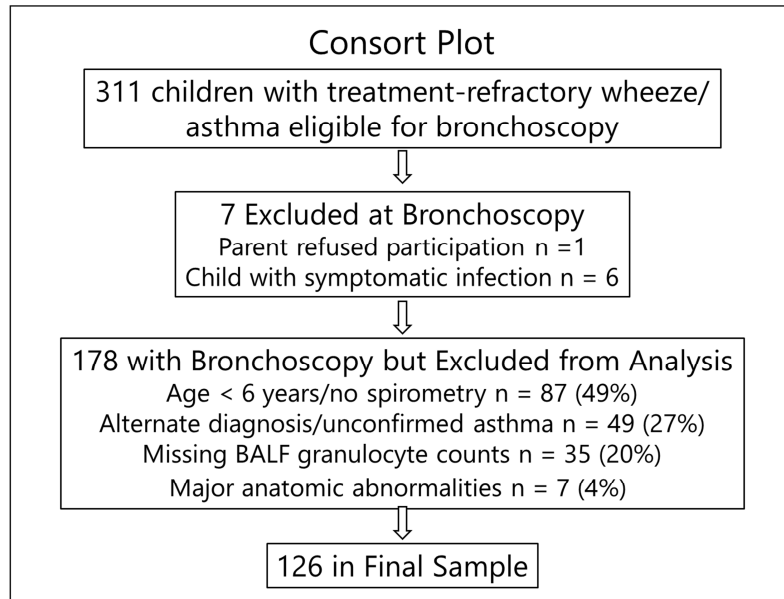

**On-Line Supplement Figure E2**

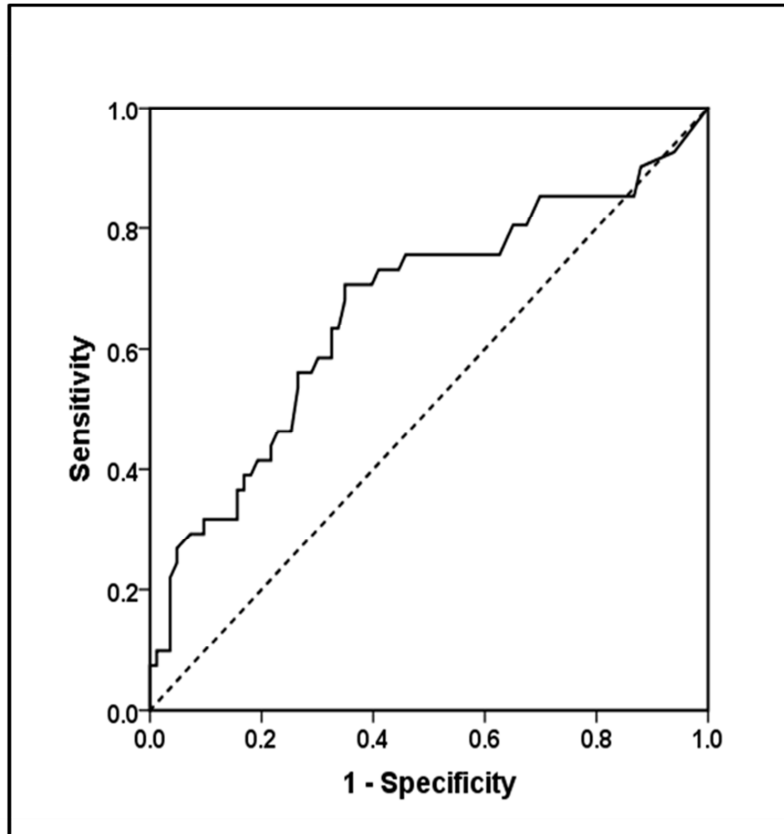

Supplement: NIHMS1522067-supplement-2.pdf [file NIHMS1522067-supplement-2.pdf]
